# Supplementary material for: Electrochemistry of chemiluminescent novel hybrid nanocomposites based on polyaniline and hydrolyzed pectin with CdS nanoparticles
Source: Royal Society of Chemistry journal article supplement (doi:10.1039/c8ra10204j), 2019-01-01
Supplement: c8ra10204j1.pdf [file c8ra10204j1.pdf]

**Table S1** The EDX analyses of CdS@HPEc-g-PANi and mCdS@HPEc-g-PANi

| Element | CdS@HPEc-g-PANi | mCdS@HPEc-g-PANi |
|---------|-----------------|------------------|
| C       | 46.87           | 51.09            |
| O       | 14.99           | 13.37            |
| N       | 25.45           | 19.80            |
| Cd      | 4               | 6.85             |
| S       | 8.68            | 8.90             |

**Table S2** The  $T_{\max}$  values and total weight loss (%) obtained by TGA analyses

| Sample           | $T_{\max}$ | Total weight loss (%) |
|------------------|------------|-----------------------|
| HPEc-g-PANi      | 396 °C     | 55.75                 |
| CdS@HPEc-g-PANi  | 421 °C     | 48.14                 |
| mCdS@HPEc-g-PANi | 403 °C     | 51.68                 |

**Table S3** The values of  $\tan \delta$  and  $T_g$  obtained by DMTA analyses

| Sample           | $\tan \delta$ | $T_g$  |
|------------------|---------------|--------|
| HPEc-g-PANi      | 0.023         | 250 °C |
| CdS/HPEc-g-PANi  | 0.021         | 300 °C |
| mCdS@HPEc-g-PANi | 0.015         | 225 °C |

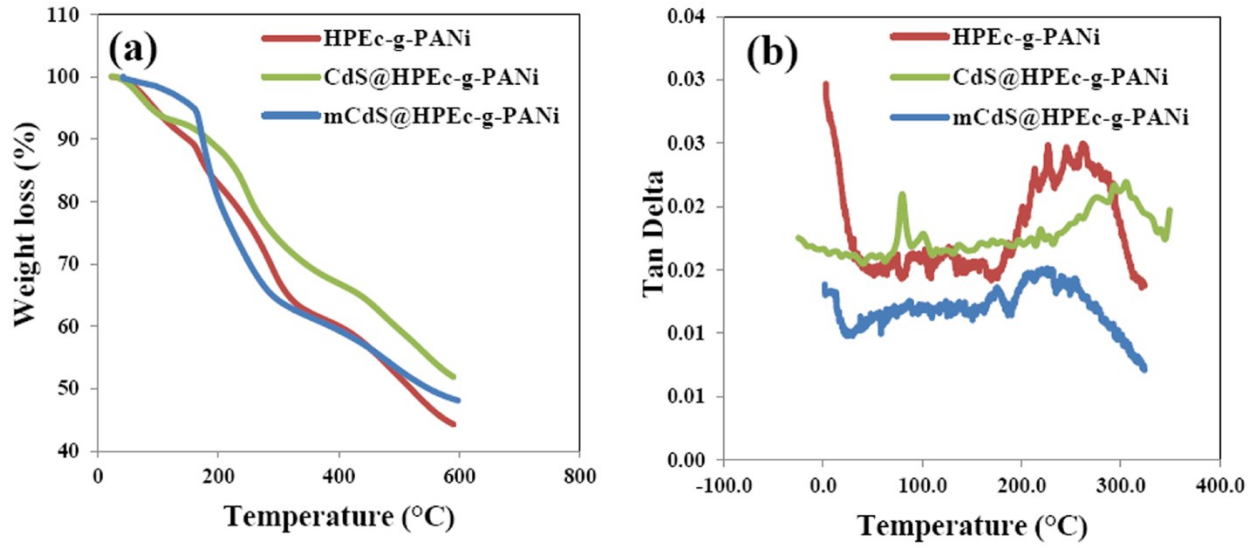

1S FIG.

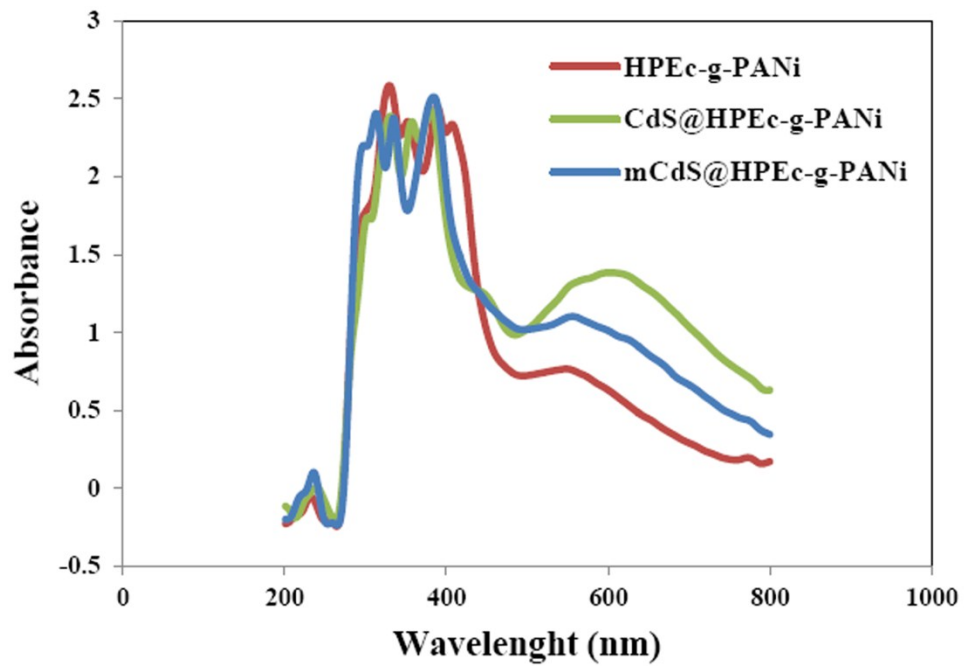

2S FIG.

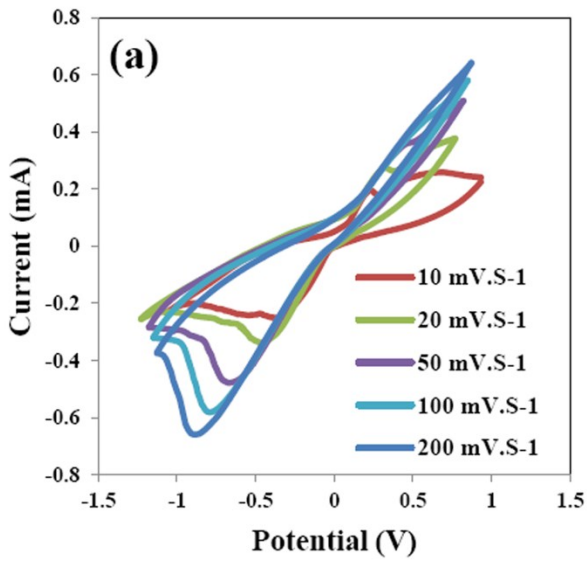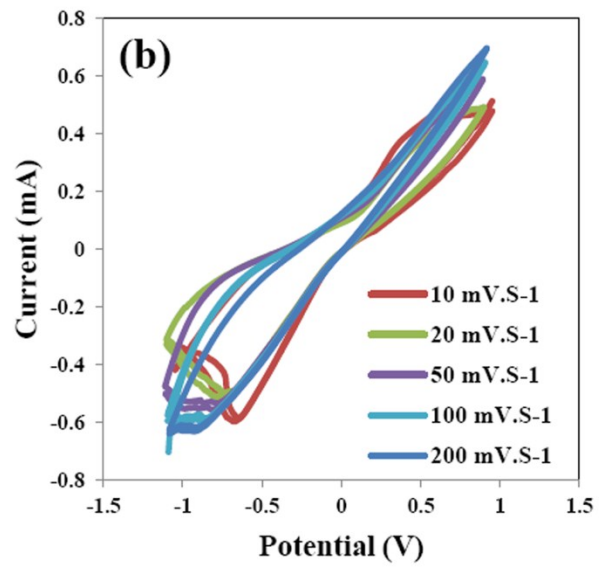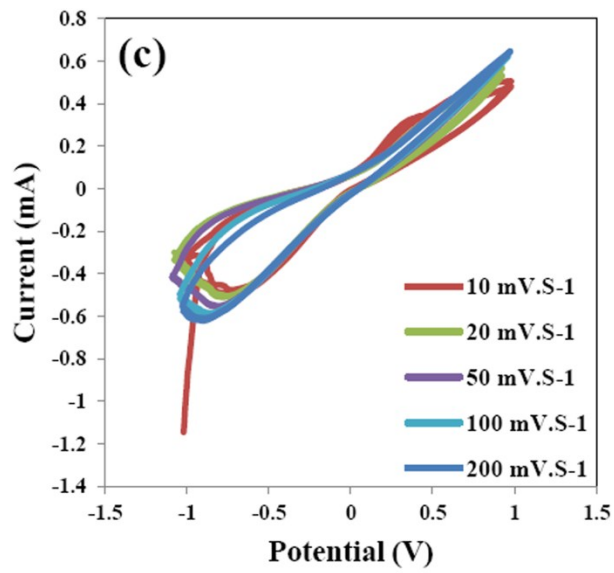

3S FIG.
